# Supplementary material for: High detectivity, efficient, ambient-stable inverted organic photodetectors incorporating a conjugated polymer as an electron transport layer
Source: Royal Society of Chemistry journal article supplement (doi:10.1039/d4tc00213j), 2024-01-01
Supplement: d4tc00213j1.pdf [file d4tc00213j1.pdf]

## Supplementary Information

### **High-detectivity, efficient, ambient-stable inverted organic photodetectors incorporating conjugated polymer as an electron transport layer**

Fang-Chi Hsu<sup>1,\*</sup>, Zhan-Yu Yeh<sup>1</sup>, and Chi-Ping Li<sup>2</sup>

<sup>1</sup>Department of Materials Science and Engineering, National United University, Miaoli 360, Taiwan

<sup>2</sup>Department of Chemical Engineering, National United University, Miaoli 360, Taiwan

#### **Contents**

- S1. Statistic plots for the dark and the light current densities of both OPDs.
- S2.  $J - V$  characteristics of ITO/ETL/P3HT/MoO<sub>3</sub>/Ag planar heterojunction structure in the dark.
- S3.  $J^{1/2} - V$  and  $\log J - \log V$  characteristics of the electron-only devices
- S4.  $J - V$  characteristics of OPDs using ZnO, PFN-OX, and N2200/PFN-OX as ETLs in the dark.

### S1. Statistic plots for the dark and the light current densities of both OPDs.

The statistic plots of the dark and the light current densities at  $V = -1$  and  $0$  V are shown in Fig. S1. At  $-1$  V, the average dark current densities for ZnO and N2200/PFN-OX devices are  $(5.27 \pm 0.37) \times 10^{-9}$  and  $(4.04 \pm 0.48) \times 10^{-10}$  A/cm<sup>2</sup>, respectively, and the respective light currents are  $6.63 \pm 0.19$  and  $7.36 \pm 0.07$  mA/cm<sup>2</sup>. At  $0$  V, the average dark current densities for ZnO and N2200/PFN-OX devices are  $(3.29 \pm 0.61) \times 10^{-10}$  and  $(2.43 \pm 0.64) \times 10^{-11}$  A/cm<sup>2</sup>, respectively, and the respective light current densities are  $6.28 \pm 0.20$  and  $6.90 \pm 0.14$  mA/cm<sup>2</sup>.

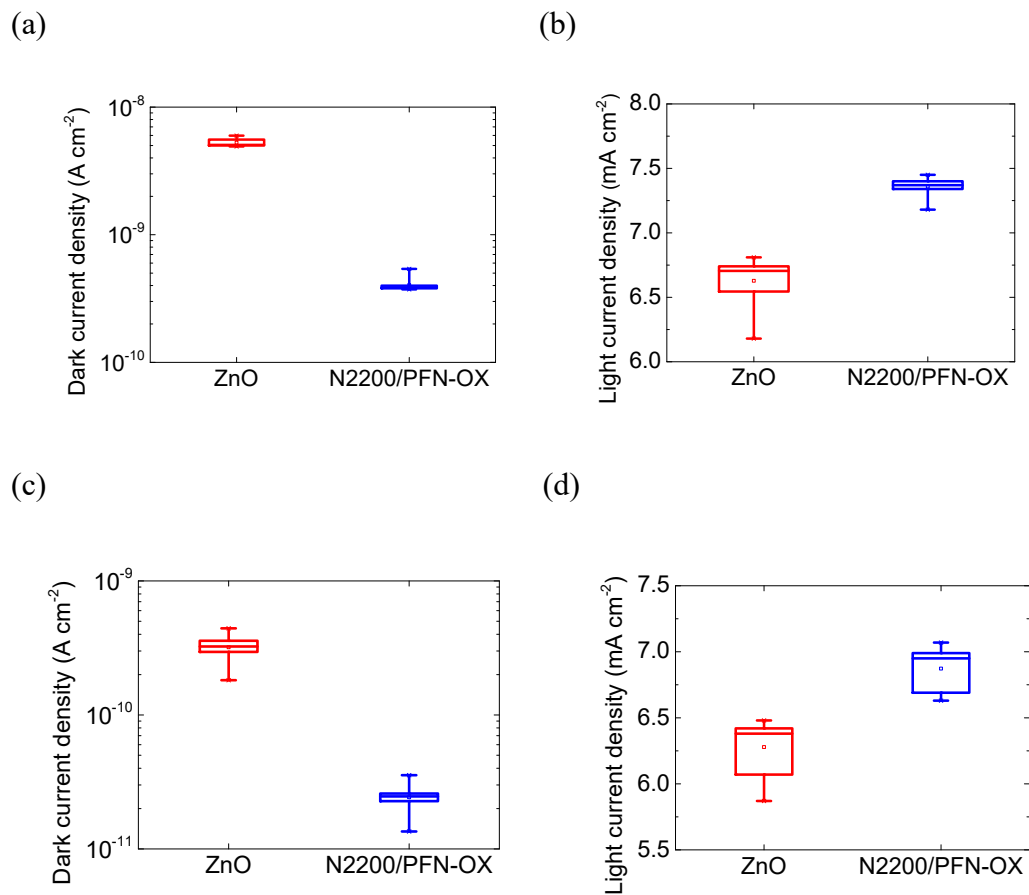

Fig. S1 Statistics plots for ZnO and N2200/PFN-OX OPDs at  $V = -1$  and  $0$  V. (a) The dark and (b) the light current densities at  $-1$  V. (c) The dark and (d) the light current densities at  $0$  V.

**S2.  $J - V$  characteristics for ITO/ETL/P3HT/MoO<sub>3</sub>/Ag planar heterojunction structure in the dark.**

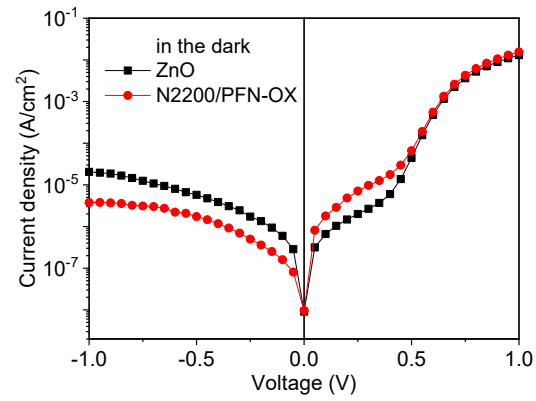

Fig. S2 Current density – Voltage ( $J - V$ ) characteristics for planar heterojunction structure based on ZnO and N2200/PFN-OX as ETLs in the dark.

### S3. $J^{1/2} - V$ and $\log J - \log V$ characteristics of the electron-only devices

(a)

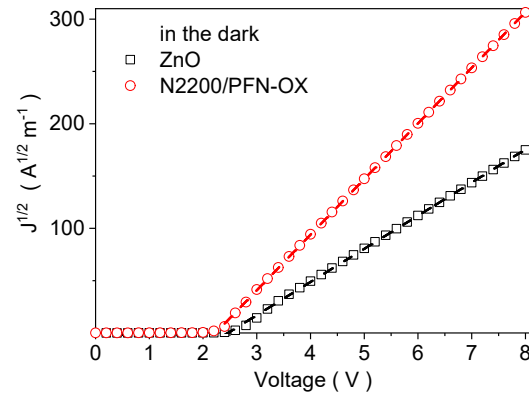

(b)

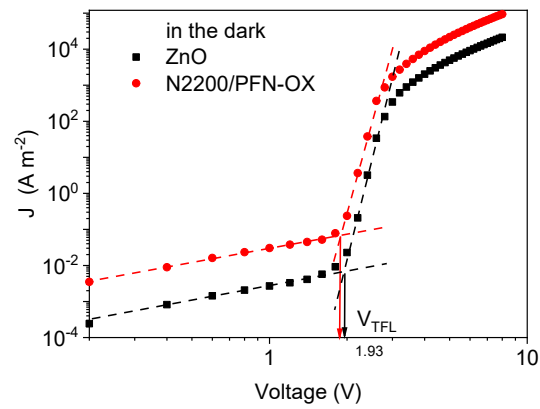

Fig. S3 (a)  $J^{1/2} - V$  and (b)  $\log J - \log V$  characteristics of the electron-only devices (ITO/ETL/P3HT:PCBM/MoO<sub>3</sub>/Al).

**S4.  $J - V$  characteristics of OPDs using ZnO, PFN-OX, and N2200/PFN-OX as ETLs in the dark**

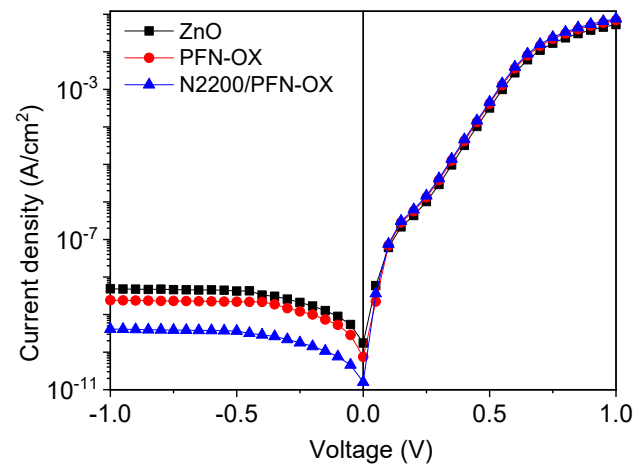

Fig. S4 Current density – Voltage ( $J - V$ ) characteristics for ZnO, PFN-OX, N2200/PFN-OX OPDs in the dark.
